# Supplementary material for: Effect of CB2 Stimulation on Gene Expression in Pediatric B-Acute Lymphoblastic Leukemia: New Possible Targets
Source: MDPI journal article supplement (doi:10.3390/ijms23158651), 2022-08-03
Supplement: s1 [file s1]

**Supplementary Table S1**

| <b>Sample Name</b> | <b>Total</b> | <b>Trimmed</b> | <b>% Trim.</b> | <b>Trim. passed</b> | <b>Unique Mapped</b> | <b>% uniq mapp</b> | <b>Multi mapped</b> | <b>Total mapped</b> | <b>% tot mapped</b> | <b>Couted</b> | <b>% counted on mapped</b> | <b>Detected genes</b> |
|--------------------|--------------|----------------|----------------|---------------------|----------------------|--------------------|---------------------|---------------------|---------------------|---------------|----------------------------|-----------------------|
| <b>NT</b>          | 2062923      | 5345           | (0.3%)         | 2057578             | 1427503              | 69.4%              | 301762              | 1729265             | 84%                 | 1010785       | 58.5%                      | 9301                  |
| <b>JWH-133</b>     | 2830976      | 17563          | (0.6%)         | 2813413             | 1669648              | 59.3%              | 364245              | 2033893             | 72.3%               | 1201407       | 59.1%                      | 9913                  |
| <b>AM630</b>       | 2178700      | 4488           | (0.2%)         | 2174212             | 1517858              | 69.8%              | 280640              | 1798498             | 82.7%               | 1054603       | 58.6%                      | 9360                  |
